# Supplementary material for: Accurate Measurement of the in vivo Ammonium Concentration in Saccharomyces cerevisiae
Source: PubMed Central journal article supplement (PMC4931543; doi:10.3390/metabo6020012), 2016-04-23
Supplement: metabolites-06-00012-s001.pdf [file metabolites-06-00012-s001.pdf]

## Supplementary Material

**Table S1.** Comparison between samples exposed to [Polyvinylidene Difluoride](#) (PVDF) filters and samples not exposed to PVDF filters.

| Sample set                                        | Measured concentration*<br>( $\mu\text{mol/L}$ ) | Condition                                                                                                                                                                                                                                                                                                                                                                                                                                             |
|---------------------------------------------------|--------------------------------------------------|-------------------------------------------------------------------------------------------------------------------------------------------------------------------------------------------------------------------------------------------------------------------------------------------------------------------------------------------------------------------------------------------------------------------------------------------------------|
| Standard 100 $\mu\text{L}$                        | $103.6 \pm 4.9$                                  | Standard solution mixed with internal standard and derivatized with DEEMM.                                                                                                                                                                                                                                                                                                                                                                            |
| Centrifugation<br>"mock" sample                   | $105.8 \pm 4.2$                                  | 120 $\mu\text{L}$ standard solution 500 $\mu\text{M}$ $\text{NH}_4^+$ mixed with 120 $\mu\text{L}$ internal standard in 5 mL ethanol 75% ( <i>v/v</i> ), boiled for 3 minutes. Re-suspended in 600 $\mu\text{L}$ milli-Q after ethanol evaporation.                                                                                                                                                                                                   |
| Standard 100 $\mu\text{L}$<br>in 30 mL<br>Ethanol | $92.3 \pm 14.7$                                  | 120 $\mu\text{L}$ standard solution 500 $\mu\text{M}$ $\text{NH}_4^+$ mixed with 120 $\mu\text{L}$ internal standard in 30 mL ethanol 75% ( <i>v/v</i> ), boiled for 3 minutes. Re-suspended in 600 $\mu\text{L}$ milli-Q after ethanol evaporation.                                                                                                                                                                                                  |
| Filtration<br>"mock" sample                       | $120.6 \pm 20.9$                                 | 120 $\mu\text{L}$ standard solution 500 $\mu\text{M}$ $\text{NH}_4^+$ mixed with 120 $\mu\text{L}$ internal standard in 30 mL ethanol 75% ( <i>v/v</i> ), boiled together with a 0.45 $\mu\text{m}$ PVDF filter for 3 minutes. Re-suspended in 600 $\mu\text{L}$ milli-Q after ethanol evaporation.                                                                                                                                                   |
| Filter + NaCl in<br>ethanol                       | $156.3 \pm 15.7$                                 | 120 $\mu\text{L}$ standard solution 500 $\mu\text{M}$ $\text{NH}_4^+$ mixed with 120 $\mu\text{L}$ internal standard and 100 $\mu\text{L}$ of NaCl 100 mg/mL in 30 mL ethanol 75% ( <i>v/v</i> ), boiled together with a PVDF filter for 3 minutes. Re-suspended in 600 $\mu\text{L}$ milli-Q after ethanol evaporation.                                                                                                                              |
| Filter + NaCl in<br>quenching<br>solution         | $117.0 \pm 41.7$                                 | 120 $\mu\text{L}$ standard solution 500 $\mu\text{M}$ $\text{NH}_4^+$ mixed with 120 $\mu\text{L}$ internal standard in 30 mL ethanol 75% ( <i>v/v</i> ), boiled together with a PVDF filter for 3 minutes. The filter was previously exposed to 30 mL of methanol at $-40\text{ }^\circ\text{C}$ and 100 $\mu\text{L}$ NaCl 100 mg/mL. Re-suspended in 600 $\mu\text{L}$ milli-Q after ethanol evaporation.                                          |
| Filter incubated<br>in DBAA                       | $107.7 \pm 33.7$                                 | 120 $\mu\text{L}$ standard solution 500 $\mu\text{M}$ $\text{NH}_4^+$ mixed with 120 $\mu\text{L}$ internal standard and 100 $\mu\text{L}$ of NaCl 100 mg/mL in 30 mL ethanol 75% ( <i>v/v</i> ), boiled together with a PVDF filter for 3 minutes. The filter was previously exposed to 30 mL of methanol at $-40\text{ }^\circ\text{C}$ and incubated 5 minutes in DBAA 25 mM. Re-suspended in 600 $\mu\text{L}$ milli-Q after Ethanol evaporation. |

\* Average value  $\pm$  Standard deviation of three injections of triplicate samples.
